# Supplementary material for: Factors influencing dietary behaviours in urban food environments in Africa: a systematic mapping review
Source: PubMed Central journal article supplement (PMC7116038; doi:10.1017/s1368980019005305), 2020-10
Supplement: EMS85322-supplement-Additional_tables_2_and_3.pdf [file EMS85322-supplement-Additional_tables_2_and_3.pdf]

Additional Table 2: Quality assessment scores for qualitative studies. Yes- 2, Partial- 1, No- 0, Not applicable-NA

|                                                                                            | Question/<br>objective | Study design | Context | Theoretical<br>framework | Sampling | Data collection | Data analysis | Verification<br>procedure | Conclusions | Reflexivity |
|--------------------------------------------------------------------------------------------|------------------------|--------------|---------|--------------------------|----------|-----------------|---------------|---------------------------|-------------|-------------|
| Batnitzky <i>et al.</i> (2008) <sup>(16)</sup>                                             | 2                      | 2            | 2       | 2                        | 1        | 1               | 0             | 0                         | 2           | 0           |
| Boatema <i>et al.</i> (2018) <sup>(17)</sup>                                               | 2                      | 2            | 2       | 2                        | 1        | 2               | 2             | 0                         | 2           | 0           |
| Brown <i>et al.</i> (2015) <sup>(18)</sup>                                                 | 2                      | 2            | 2       | 2                        | 2        | 2               | 2             | 0                         | 2           | 0           |
| *Charlton <i>et al.</i> (2014) <sup>(59)</sup>                                             | 2                      | 1            | 1       | 2                        | 1        | 2               | 1             | 0                         | 2           | 0           |
| Craveriro <i>et al.</i> (2016) <sup>(19)</sup>                                             | 1                      | 2            | 2       | 1                        | 2        | 2               | 2             | 2                         | 2           | 0           |
| Draper <i>et al.</i> (2016) <sup>(20)</sup>                                                | 1                      | 2            | 2       | 2                        | 2        | 2               | 2             | 2                         | 2           | 0           |
| Legwegoh <i>et al.</i> (2012) <sup>(22)</sup> , (2016) <sup>(22)</sup>                     | 1                      | 2            | 2       | 2                        | 2        | 2               | 1             | 0                         | 1           | 0           |
| *Pradeilles (2015) <sup>(60)</sup>                                                         | 2                      | 2            | 2       | 2                        | 2        | 2               | 2             | 2                         | 2           | 0           |
| Rguibi and Behalsen, 2006 <sup>(23)</sup>                                                  | 2                      | 2            | 1       | 2                        | 1        | 1               | 0             | 0                         | 2           | 0           |
| Sedibe <i>et al.</i> (2014) <sup>(24)</sup> ; Voorend <i>et al.</i> (2013) <sup>(25)</sup> | 2                      | 2            | 2       | 2                        | 2        | 2               | 2             | 2                         | 2           | 0           |

\*mixed methods study- scored here for qualitative component. Quality appraisal was conducted using using a validated quality assessment tool<sup>(13)</sup>.

Additional Table 3: Quality assessment scores for quantitative studies. Yes- 2, Partial- 1, No- 0, Not applicable-NA.

|                                                                                           | Question/<br>objective | Study design | Subject selection | Subject characteristics | Random allocation | Investigator blinding | Subject blinding | Outcome measure | Sample size | Data analysis | Estimate of variance | Control for confounding | Result reporting | Conclusions |
|-------------------------------------------------------------------------------------------|------------------------|--------------|-------------------|-------------------------|-------------------|-----------------------|------------------|-----------------|-------------|---------------|----------------------|-------------------------|------------------|-------------|
| Agbozo <i>et al.</i> (2018) <sup>(26)</sup>                                               | 2                      | 2            | 2                 | 2                       | NA                | NA                    | NA               | 2               | 2           | 2             | 0                    | 0                       | 2                | 1           |
| Amenyah <i>et al.</i> (2016) <sup>(27)</sup>                                              | 2                      | 2            | 2                 | 2                       | NA                | NA                    | NA               | 2               | 2           | 2             | 2                    | 1                       | 2                | 2           |
| Aounalla-Sikhiri <i>et al.</i> (2011) <sup>(28)</sup>                                     | 2                      | 2            | 2                 | 2                       | NA                | NA                    | NA               | 2               | 2           | 2             | 1                    | 2                       | 2                | 1           |
| Becquey <i>et al.</i> (2010) <sup>(29)</sup>                                              | 2                      | 2            | 2                 | 1                       | NA                | NA                    | NA               | 2               | 2           | 2             | 1                    | 2                       | 2                | 2           |
| *Charlton <i>et al.</i> (2004) <sup>(59)</sup>                                            | 2                      | 2            | 1                 | 2                       | N/A               | N/A                   | N/A              | 1               | N/A         | 0             | N/A                  | N/A                     | 2                | 2           |
| Cisse-Egbuonye <i>et al.</i> (2017) <sup>(30)</sup>                                       | 2                      | 2            | 2                 | 2                       | NA                | NA                    | NA               | 1               | 2           | 2             | 2                    | 2                       | 2                | 1           |
| Codjoe <i>et al.</i> (2016) <sup>(31)</sup>                                               | 2                      | 2            | 1                 | 2                       | NA                | NA                    | NA               | 2               | 2           | 2             | 2                    | 2                       | 2                | 1           |
| El Ansari <i>et al.</i> (2015) <sup>(32)</sup>                                            | 2                      | 2            | 1                 | 2                       | NA                | NA                    | NA               | 2               | 2           | 2             | 2                    | 2                       | 2                | 2           |
| Feeley <i>et al.</i> (2013) <sup>(33)</sup>                                               | 1                      | 2            | 1                 | 2                       | NA                | NA                    | NA               | 1               | 2           | 2             | 1                    | 2                       | 2                | 2           |
| Fokeena <i>et al.</i> (2012) <sup>(34)</sup>                                              | 2                      | 2            | 1                 | 1                       | NA                | NA                    | NA               | 2               | 1           | 2             | 2                    | 0                       | 2                | 2           |
| Glozah <i>et al.</i> (2015) <sup>(35)</sup>                                               | 2                      | 1            | 1                 | 2                       | NA                | NA                    | NA               | 1               | 2           | 2             | 2                    | 2                       | 2                | 1           |
| Gitau <i>et al.</i> (2014) <sup>(36)</sup>                                                | 2                      | 2            | 2                 | 1                       | NA                | NA                    | NA               | 2               | 1           | 2             | 0                    | 0                       | 2                | 1           |
| Hattingh <i>et al.</i> 2006 <sup>(37)</sup> ; 2011 <sup>(38)</sup> ; 2014 <sup>(39)</sup> | 1                      | 2            | 2                 | 2                       | N/A               | N/A                   | N/A              | 1               | 1           | 2             | 1                    | N/A                     | 2                | 2           |
| Jafri <i>et al.</i> (2013) <sup>(40)</sup>                                                | 2                      | 2            | 2                 | 0                       | N/A               | N/A                   | N/A              | 1               | 1           | 2             | 0                    | 0                       | 2                | 2           |
| Kiboi <i>et al.</i> (2017) <sup>(41)</sup>                                                | 1                      | 2            | 2                 | 2                       | NA                | NA                    | NA               | 2               | 2           | 2             | 2                    | 2                       | 2                | 2           |
| Landais <i>et al.</i> 2012 <sup>(42)</sup> ; (2015) <sup>(43)</sup>                       | 2                      | 2            | 2                 | 2                       | NA                | NA                    | NA               | 2               | 2           | 2             | 2                    | 1                       | 2                | 1           |
| Lopez <i>et al.</i> (2012) <sup>(44)</sup>                                                | 2                      | 2            | 1                 | 2                       | NA                | NA                    | NA               | 2               | 2           | 2             | 0                    | 0                       | 2                | 0           |
| Mayen <i>et al.</i> (2016) <sup>(45)</sup>                                                | 1                      | 2            | 2                 | 2                       | NA                | NA                    | NA               | 1               | 2           | 2             | 1                    | 0                       | 2                | 0           |
| Mbochi <i>et al.</i> (2012) <sup>(46)</sup>                                               | 2                      | 1            | 2                 | 1                       | N/A               | N/A                   | N/A              | 1               | 2           | 2             | 1                    | 0                       | 1                | 2           |
| Mogre <i>et al.</i> (2013) <sup>(47)</sup>                                                | 2                      | 2            | 2                 | 2                       | N/A               | N/A                   | N/A              | 1               | 1           | 2             | 0                    | N/A                     | 2                | 2           |
| Njelekela <i>et al.</i> (2011) <sup>(48)</sup>                                            | 1                      | 2            | 2                 | 1                       | NA                | NA                    | NA               | 2               | 2           | 2             | 1                    | 0                       | 2                | 1           |
| Onyiririuka <i>et al.</i> (2013) <sup>(49)</sup>                                          | 2                      | 2            | 2                 | 2                       | NA                | NA                    | NA               | 2               | 2           | 2             | 2                    | 0                       | 2                | 2           |
| Peltzer <i>et al.</i> (2012) <sup>(50)</sup>                                              | 2                      | 2            | 1                 | 2                       | NA                | NA                    | NA               | 2               | 2           | 2             | 0                    | 0                       | 2                | 2           |
| *Pradeilles (2015) <sup>(60)</sup>                                                        | 2                      | 2            | 2                 | 2                       | NA                | NA                    | NA               | 2               | 2           | 2             | 2                    | 2                       | 2                | 2           |
| Savy <i>et al.</i> (2008) <sup>(51)</sup>                                                 | 2                      | 2            | 2                 | 2                       | N/A               | N/A                   | N/A              | 2               | 1           | 2             | 2                    | 2                       | 2                | 2           |

|                                                                    |   |   |   |   |     |     |     |   |   |   |     |   |   |   |
|--------------------------------------------------------------------|---|---|---|---|-----|-----|-----|---|---|---|-----|---|---|---|
| Sodjinou <i>et al.</i> 2008 <sup>(52)</sup> ; 2009 <sup>(53)</sup> | 2 | 2 | 2 | 2 | N/A | N/A | N/A | 2 | 2 | 2 | 2   | 2 | 2 | 2 |
| Soualem <i>et al.</i> (2012) <sup>(54)</sup>                       | 2 | 2 | 2 | 2 | NA  | NA  | NA  | 2 | 2 | 2 | 2   | 0 | 2 | 1 |
| Steyn <i>et al.</i> (2011) <sup>(55)</sup>                         | 2 | 2 | 2 | 1 | NA  | NA  | NA  | 2 | 2 | 2 | 2   | 2 | 2 | 2 |
| Van Zyl <i>et al.</i> (2010) <sup>(56)</sup>                       | 2 | 1 | 1 | 2 | N/A | N/A | N/A | 2 | 2 | 2 | N/A | 0 | 2 | 2 |
| Waswa, 2011 <sup>(57)</sup>                                        | 2 | 2 | 2 | 2 | N/A | N/A | N/A | 1 | 1 | 2 | 2   | 1 | 2 | 2 |
| Zeba <i>et al.</i> (2014) <sup>(58)</sup>                          | 2 | 2 | 2 | 2 | NA  | NA  | NA  | 2 | 2 | 2 | 2   | 1 | 2 | 2 |

\*mixed methods study- scored here for quantitative component. Quality appraisal was conducted using a validated quality assessment tool<sup>(13)</sup>.
